# Supplementary material for: The atomic structure of a MgCo2O4 nanoparticle for a positive electrode of a Mg rechargeable battery
Source: Royal Society of Chemistry journal article supplement (doi:10.1039/c8cc09713e), 2019-01-01
Supplement: c8cc09713e1.pdf [file c8cc09713e1.pdf]

## Atomic Structure of $\text{MgCo}_2\text{O}_4$ Nanoparticle for Positive Electrode of Mg Rechargeable Battery

Naoto Kitamura,<sup>\*a</sup> Yuhei Tanabe,<sup>a</sup> Naoya Ishida,<sup>a</sup> and Yasushi Idemoto<sup>a</sup>

### Supporting information

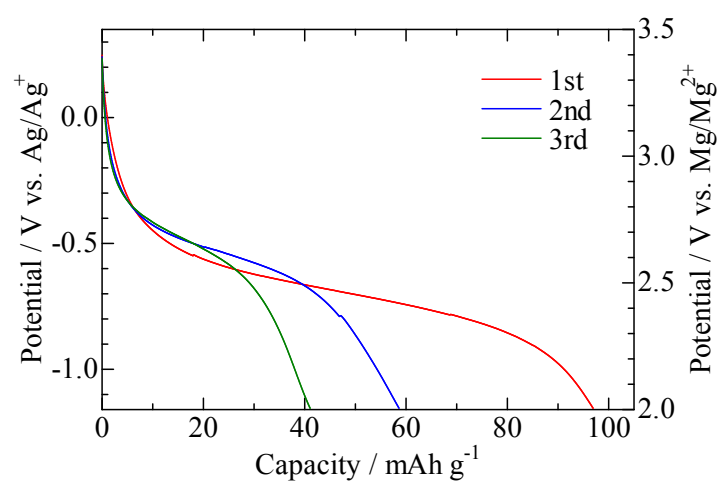

Fig. S1 Discharge curves of  $\text{MgCo}_2\text{O}_4$  nanoparticle at 90 °C. Positive electrode was a mixture of  $\text{MgCo}_2\text{O}_4$ , Super C65, and PTFE with a weight ratio of 5:5:1. Reference and negative electrodes were Ag and AZ31 ( $\text{Mg:Al:Zn}=96:3:1$ ), respectively. Electrolyte was  $1.0 \text{ mol L}^{-1}$   $\text{Mg Mg}[\text{N}(\text{SO}_2\text{CF}_3)_2]_2$  in triglyme. Current density was  $5 \text{ mA g}^{-1}$ .
